# Supplementary material for: Rapid and sensitive detection of chlordimeform in cucumber and tomato samples using an immunochromatographic assay
Source: Royal Society of Chemistry journal article supplement (doi:10.1039/d2an01923j), 2023-01-01
Supplement: d2an01923j1.pdf [file d2an01923j1.pdf]

1 **Rapid and sensitive detection of chlordimeform in cucumber**  
2 **and tomato samples using an immunochromatographic**  
3 **assay**  
4 **(Supporting information)**

## 5 Contents

6 **Figure S1.** LC-MS analysis of CDM standard solution and cucumber and tomato  
7 samples. (a) The CDM standard solution. (b-c) The cucumber and tomato samples.

8 **Figure S2.** LC-MS analysis of CDM-hapten. (a) The liquid chromatogram spectrum of  
9 CDM-S<sub>1</sub>. (b) The mass spectrum of CDM-S<sub>1</sub>. (c) The liquid chromatogram spectrum  
10 of CDM-S<sub>2</sub>. (d) The mass spectrum of CDM-S<sub>2</sub>.

11 **Figure S3.** The UV-VIS spectroscopy of CDM-S<sub>1</sub>, CDM-S<sub>2</sub>, protein and conjugates.  
12 (a) Confirmation of CDM-S<sub>1</sub>-BSA. (b) Confirmation of CDM-S<sub>1</sub>-OVA. (c)  
13 Confirmation of CDM-S<sub>2</sub>-OVA.

14 **Table S1.** The IC<sub>50</sub> values of mAbs with different coating antigen.

15 **Table S2.** Cross-reactivity of anti-CDM mAb 4A3.

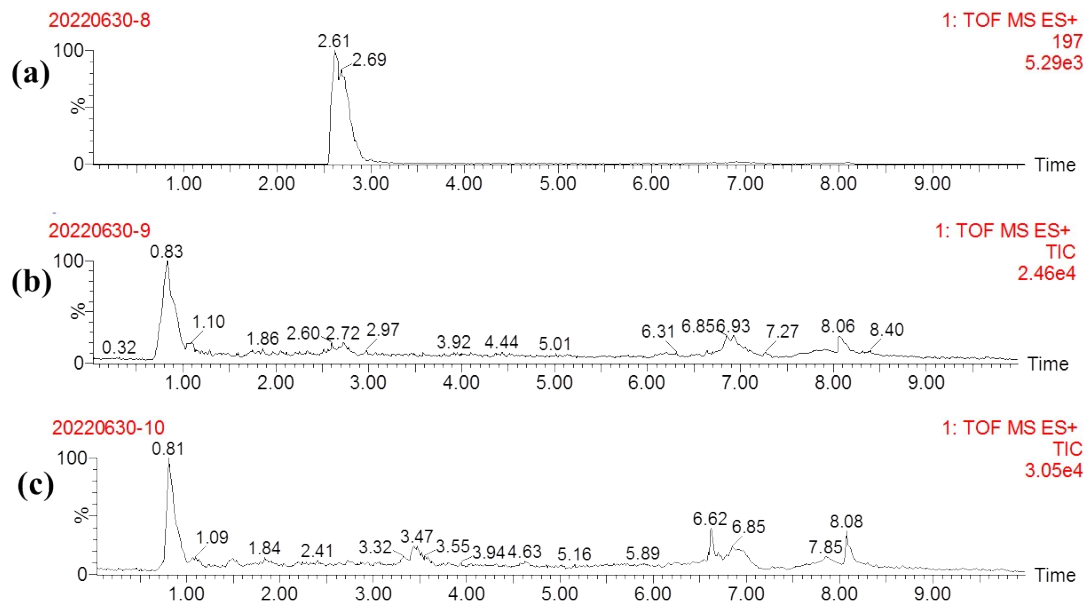

16

17 **Figure S1.** LC-MS analysis of CDM standard solution and cucumber and tomato  
 18 samples. (a) The CDM standard solution. (b-c) The cucumber and tomato samples.

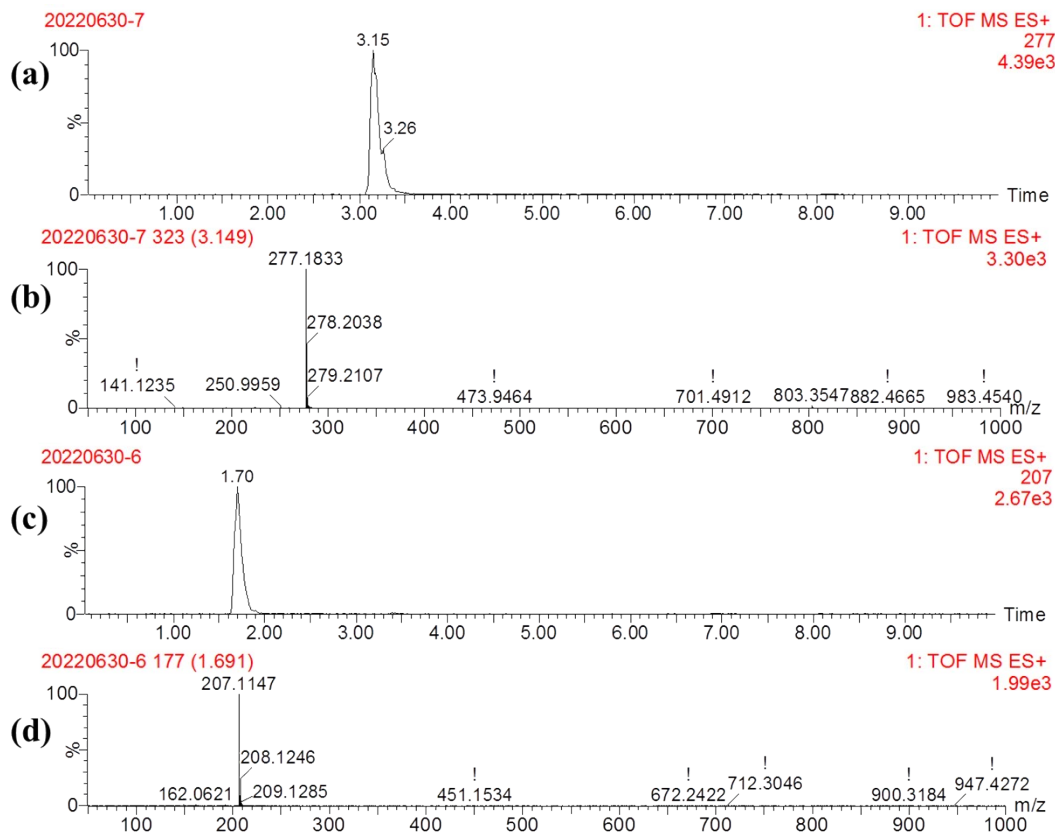

19

20 **Figure S2.** LC-MS analysis of CDM-hapten. (a) The liquid chromatogram spectrum  
 21 of CDM-S<sub>1</sub>. (b) The mass spectrum of CDM-S<sub>1</sub>. (c) The liquid chromatogram  
 22 spectrum of CDM-S<sub>2</sub>. (d) The mass spectrum of CDM-S<sub>2</sub>.

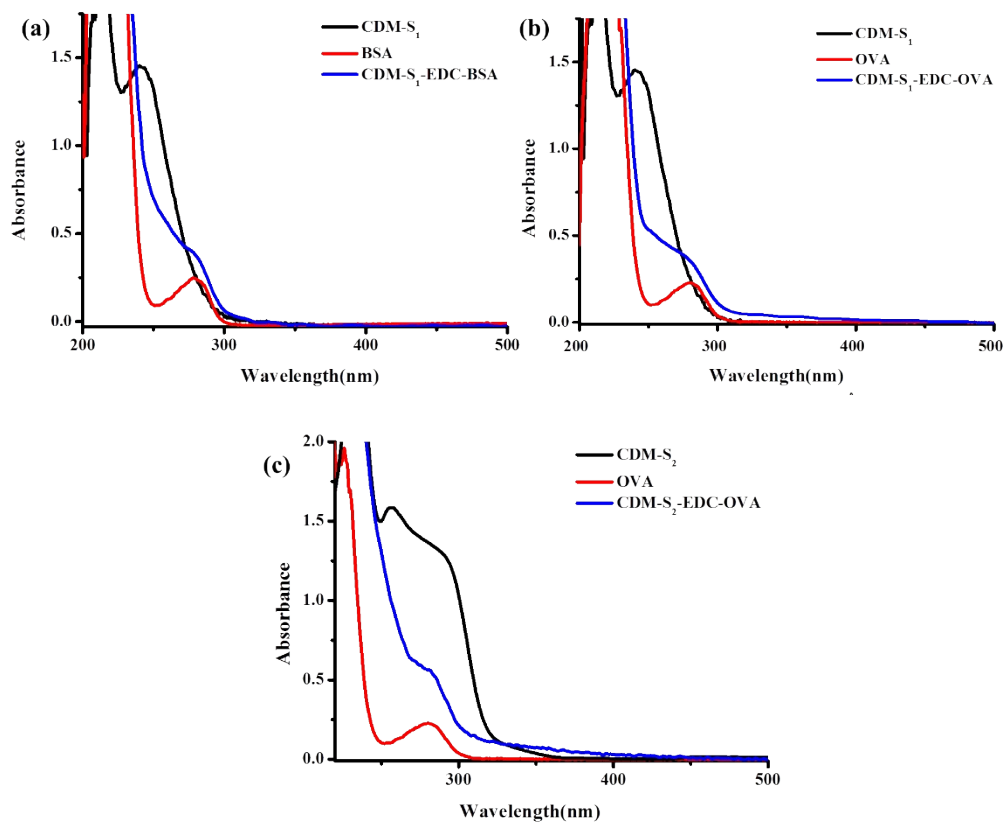

23

24 **Figure S3.** The UV-VIS spectroscopy of CDM-S<sub>1</sub>, CDM-S<sub>2</sub>, protein and conjugates.

25 (a) Confirmation of CDM-S<sub>1</sub>-BSA. (b) Confirmation of CDM-S<sub>1</sub>-OVA. (c)

26 Confirmation of CDM-S<sub>2</sub>-OVA.

27

**Table S1.** The IC<sub>50</sub> values of mAbs with different coating antigen.

| mAbs | Coating antigen    | IC <sub>50</sub> (ng/mL) |
|------|--------------------|--------------------------|
| 3E1  | CDM-S <sub>1</sub> | 1.089                    |
|      | CDM-S <sub>2</sub> | 0.391                    |
| 4A3  | CDM-S <sub>1</sub> | 0.643                    |
|      | CDM-S <sub>2</sub> | 0.287                    |

28

**Table S2.** Cross-reactivity of anti-CDM mAb 4A3.

| Competitors              | Structure                                                                            | IC <sub>50</sub> (ng/<br>mL) | CR (%) |
|--------------------------|--------------------------------------------------------------------------------------|------------------------------|--------|
| Chlordimeform            | 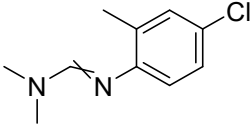   | 0.287                        | 100    |
| Formetanate              |    | >50                          | <5     |
| Amitraz                  |    | >50                          | <5     |
| 2,4-dimethylformamidine  |   | >50                          | <5     |
| 2,4-dimethylaniline      |   | >50                          | <5     |
| 4-chloro-2-methylaniline |   | >50                          | <5     |
| 3-acetamidophenol        |  | >50                          | <5     |
